# Supplementary material
Source: MDPI journal article supplement (https://www.mdpi.com/2304-6740/10/11/180)
Supplement: s1 [file s1]

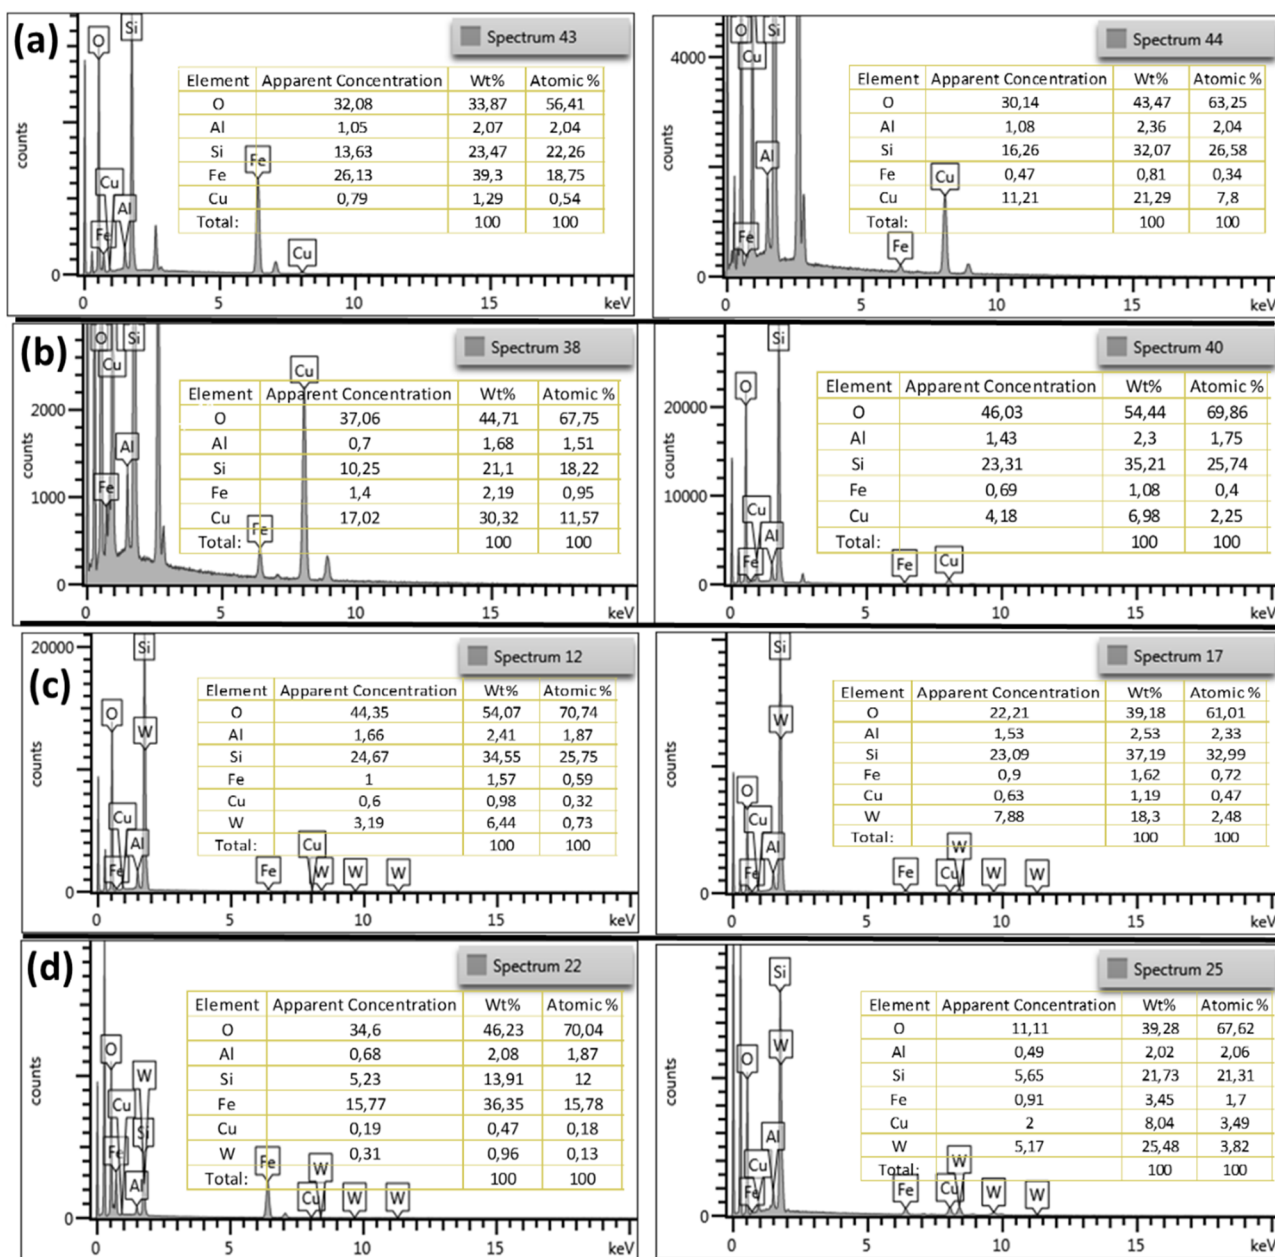

**Figure S1.** EDX reports of analysed spectra recorded on (a) Fe-Cu-Z, (b) Fe-Cu-Zag, (c) W-Fe-Cu-Z and (d) W-Fe-Cu-Zag catalysts.
